# Supplementary material for: A facile synthesis of strong near infrared fluorescent layered double hydroxide nanovehicles with an anticancer drug for tumor optical imaging and therapy
Source: Royal Society of Chemistry journal article supplement (doi:10.1039/c3nr00781b), 2013-01-01
Supplement: c3nr00781b.pdf [file c3nr00781b.pdf]

## Supporting Information

### A Facile Synthesis of Strong Near Infrared Fluorescent Layered Double Hydroxide Nanovehicles with Anticancer Drug for Tumor Optical Imaging and Therapy

Chunping Chen,<sup>a</sup> Lee Kim Yee,<sup>b</sup> Hua Gong,<sup>a</sup> Yong Zhang,<sup>b</sup> Rong Xu<sup>a\*</sup>

<sup>a</sup>School of Chemical and Biomedical Engineering, Nanyang Technological University, 62, Nanyang Drive, Singapore 637459.

<sup>b</sup>Division of Bioengineering, Faculty of Engineering, National University of Singapore, 117574.

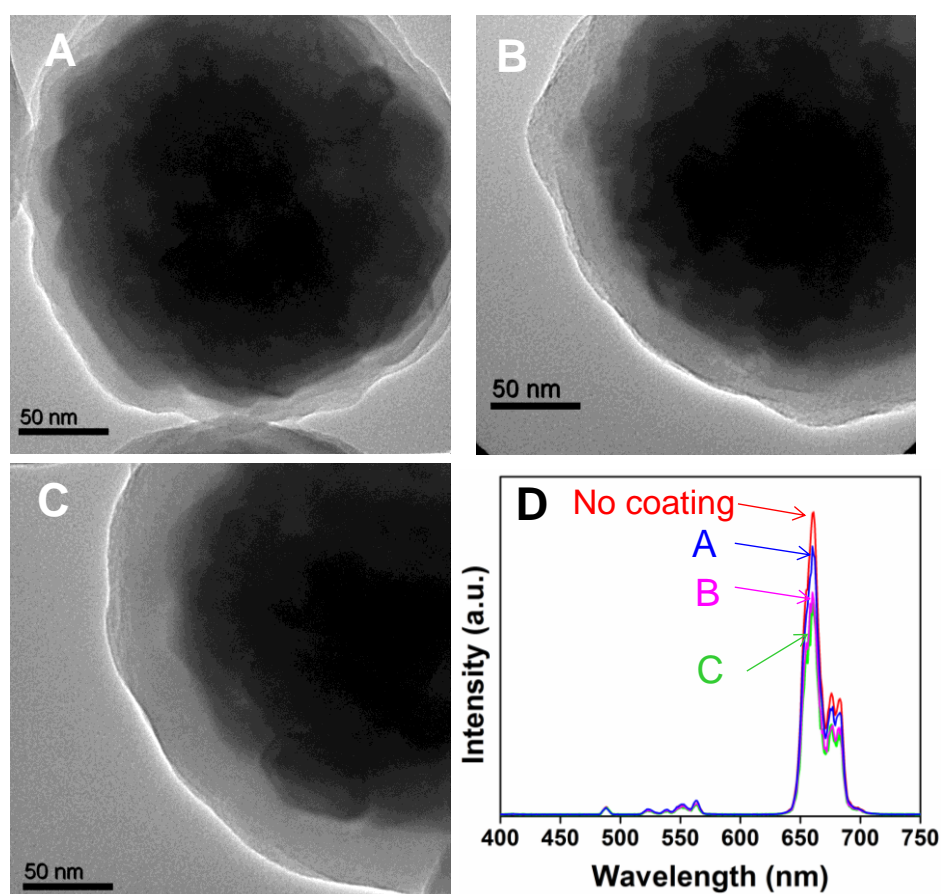

**Fig. S1** TEM images of Y<sub>2</sub>O<sub>3</sub>:Er<sup>3+</sup>,Yb<sup>3+</sup>@SiO<sub>2</sub> synthesized by using different amount of TEOS, (A) 0.161 mL, (B) 0.323 mL and (C) 0.645 mL and (D) up-conversion emission spectra of the corresponding samples shown in A-C, and pristine Y<sub>2</sub>O<sub>3</sub>:Er<sup>3+</sup>,Yb<sup>3+</sup> without SiO<sub>2</sub> coating.

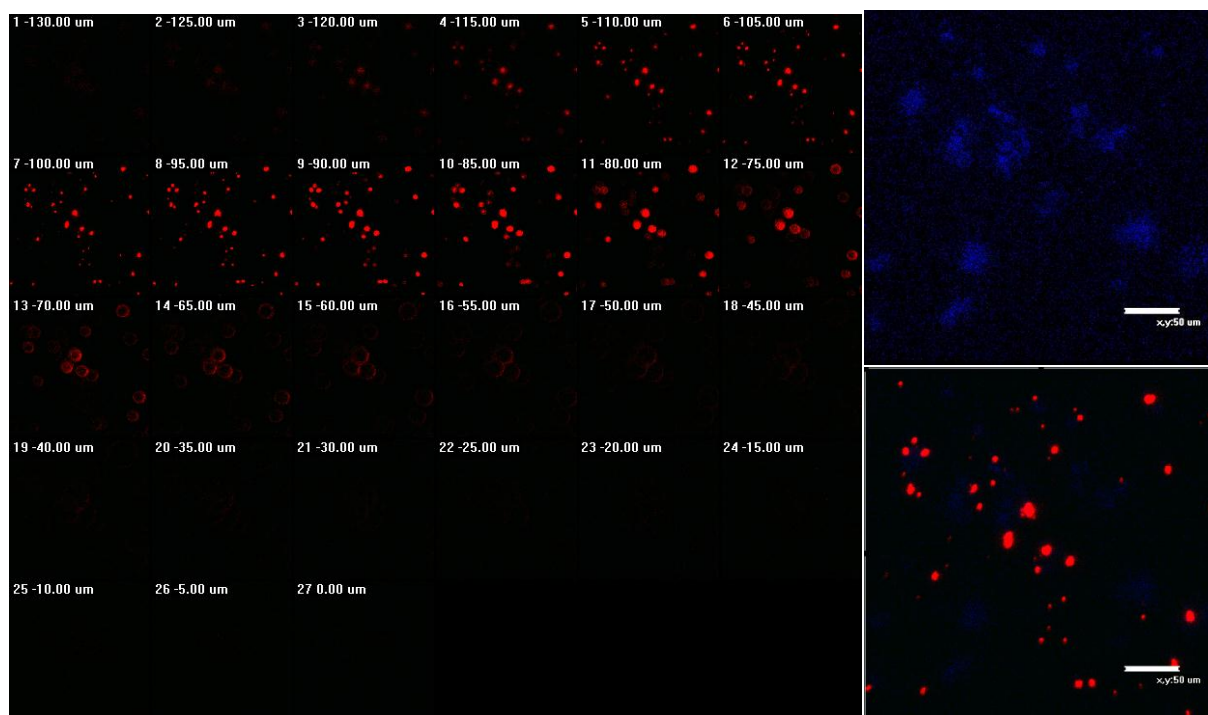

**Fig. S2** Confocal scanning laser microscopy image (Z stack) of MCF-7 cells incubated with  $\text{Y}_2\text{O}_3:\text{Er}^{3+}, \text{Yb}^{3+}@\text{SiO}_2@\text{LDH-5FU}$  at  $100 \mu\text{g mL}^{-1}$  for 30 min.

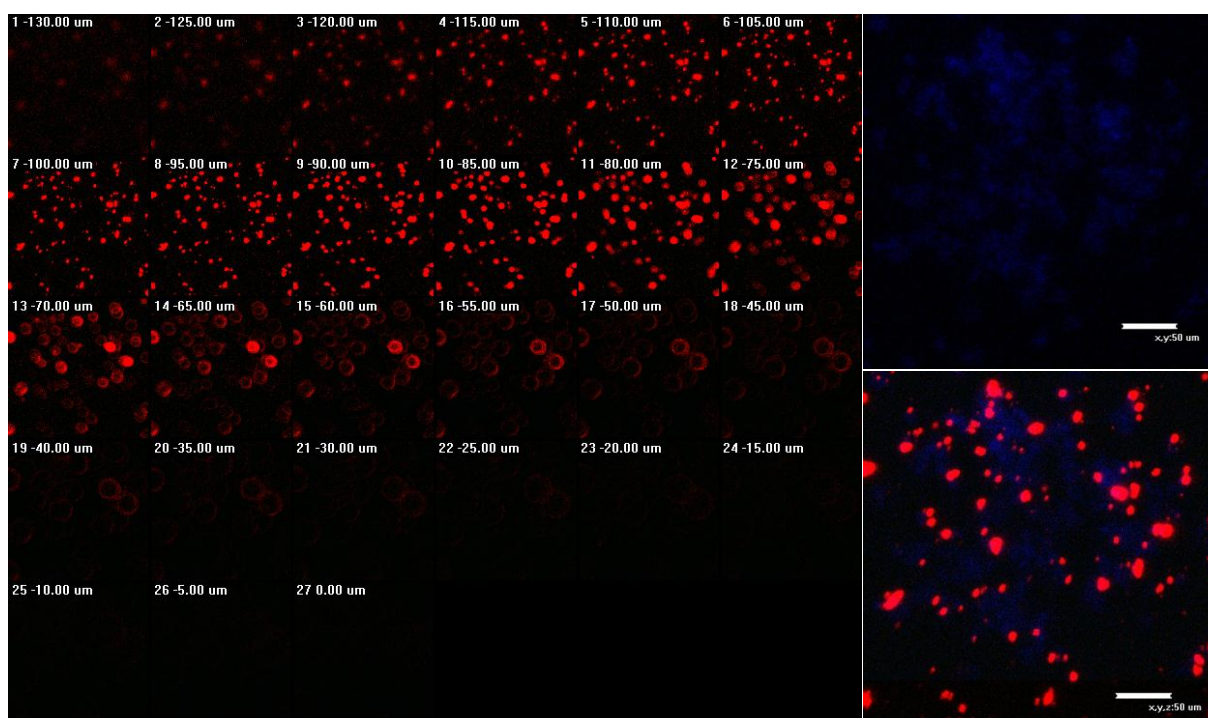

**Fig. S3** Confocal scanning laser microscopy image (Z stack) of MCF-7 cells incubated with  $\text{Y}_2\text{O}_3:\text{Er}^{3+}, \text{Yb}^{3+}@\text{SiO}_2@\text{LDH-5FU}$  at  $100 \mu\text{g mL}^{-1}$  for 24 h.
